# Supplementary material for: Gene Dosage, Expression, and Ontology Analysis Identifies Driver Genes in the Carcinogenesis and Chemoradioresistance of Cervical Cancer
Source: PubMed Central journal article supplement (PMC2768783; doi:10.1371/journal.pgen.1000719), 2009-11-13
Supplement: pgen.1000719.s005.pdf [file pgen.1000719.s005.pdf]

**Table S1.** Recurrent high level amplifications and homozygous deletions in locally advanced cervical cancer.

| Peak region <sup>a</sup><br>(Cytoband)    | Peak region <sup>a</sup><br>(MB) | Freq. <sup>b</sup><br>(%) | Max./min.<br>gene dosage <sup>c</sup><br>(copy no.) | Correlating genes <sup>d</sup>                                                                                                                   |
|-------------------------------------------|----------------------------------|---------------------------|-----------------------------------------------------|--------------------------------------------------------------------------------------------------------------------------------------------------|
| <b>Recurrent high level amplification</b> |                                  |                           |                                                     |                                                                                                                                                  |
| 3q26.1-qter                               | 166.2-199.5                      | 8                         | 4.5 (9)                                             | <i>PDCD10, PHC3, ZNF639, FXR1, PARL, DVL3, ABCF3, ALG3, EIF4G1, SFRS10, DGKG, EIF4A2, RFC4, CCDC50, PPP1R2, PAK2, NCBP2, DLG1, BDH1, FLYTTD1</i> |
| 5p15.2-pter                               | 1.0-12.1                         | 8                         | 4 (15)                                              | <i>CLPTM1L, MED10, FASTKD3, CCT5, DAP</i>                                                                                                        |
| 9p24.1-2                                  | 2.7-6.0                          | 4                         | 13.5 (27)                                           | <i>KIAA0020, RCL1</i>                                                                                                                            |
| 11q13.2-3                                 | 68.6-70.6                        | 4                         | 10 (20)                                             | <i>FADD</i>                                                                                                                                      |
| 11q22.1-2                                 | 100.2-102.0                      | 5                         | 36 (72)                                             | <i>YAP1, BIRC3, BIRC2</i>                                                                                                                        |
| 20q11.21-22                               | 30.0-33.0                        | 5                         | 3.4 (9)                                             | <i>POFUT1, KIF3B, MAPRE1, SNTA1, EIF2S2, AHCY</i>                                                                                                |
| 21q22.11-2                                | 32.9-39.6                        | 4                         | 7.5 (15)                                            | <i>TTC3, BRWD1</i>                                                                                                                               |
| <b>Homozygous deletion<sup>e</sup></b>    |                                  |                           |                                                     |                                                                                                                                                  |
| 5q13.2                                    | 67.4-71.7                        | 1                         | 0 (0)                                               | <i>SMN2</i>                                                                                                                                      |
| 6p21.1-p12.1                              | 44.1-54.1                        | 1                         | 0 (0)                                               | -                                                                                                                                                |
| 8q24.23                                   | 136.6-139.3                      | 1                         | 0 (0)                                               | -                                                                                                                                                |
| 9p21.1-3                                  | 22.6-29.6                        | 1                         | 0 (0)                                               | <i>MOBK2L2B</i>                                                                                                                                  |
| 10q23.31                                  | 88.2-92.1                        | 3                         | 0 (0)                                               | -                                                                                                                                                |
| 13q34                                     | 111.7-114.1                      | 1                         | 0 (0)                                               | -                                                                                                                                                |

<sup>a</sup>Peak region of high level amplifications is the region with more than 25% higher amplitude than surrounding region. Peak region of homozygote deletions is the region with a gene dosage of zero.

<sup>b</sup>Frequency is the median percentage of tumors with the alteration.

<sup>c</sup>Gene dosage is absolute DNA copy number divided by ploidy. Maximum (gain) or minimum (loss) gene dosage and the corresponding copy number are listed.

<sup>d</sup>Genes within the peak region showing a correlation between gene dosage and expression are ordered by DNA location.

<sup>e</sup>Homozygote deletions were seen in only few tumors and were not detected as recurrent in statistical analysis.
