# Supplementary material for: Gene Dosage, Expression, and Ontology Analysis Identifies Driver Genes in the Carcinogenesis and Chemoradioresistance of Cervical Cancer
Source: PubMed Central journal article supplement (PMC2768783; doi:10.1371/journal.pgen.1000719), 2009-11-13
Supplement: pgen.1000719.s006.pdf [file pgen.1000719.s006.pdf]

**Table S2.** Relationships between Illumina, cDNA, and gene dosage data for correlating genes<sup>a</sup>.

| Reporter ID | IlluminaID   | Gene     | cDNA vs gene dosage |       | cDNA vs gene dosage |       | cDNA vs Illumina |       | Illumina vs gene dosage |       |
|-------------|--------------|----------|---------------------|-------|---------------------|-------|------------------|-------|-------------------------|-------|
|             |              |          | 95 patients         |       | 52 patients         |       |                  |       |                         |       |
|             |              |          | R                   | p     | R                   | p     | R                | p     | R                       | p     |
| 129563      | ILMN_1762582 | ARNT     | 0.407               | 0.000 | 0.403               | 0.004 | 0.412            | 0.003 | 0.411                   | 0.003 |
| 814158      | ILMN_1669113 | ATF5     | 0.347               | 0.001 | 0.520               | 0.000 | 0.812            | 0.000 | 0.488                   | 0.000 |
| 825312      | ILMN_1772929 | ATP5J    | 0.369               | 0.002 | 0.421               | 0.007 | 0.611            | 0.000 | 0.368                   | 0.010 |
| 877832      | ILMN_1853837 | BCAP31   | 0.327               | 0.001 | 0.225               | 0.111 | 0.866            | 0.000 | 0.280                   | 0.047 |
| 782748      | ILMN_1708485 | BIN3     | 0.502               | 0.000 | 0.577               | 0.000 | 0.345            | 0.013 | 0.415                   | 0.003 |
| 34852       | ILMN_1768194 | BIRC2    | 0.475               | 0.000 | 0.467               | 0.000 | 0.697            | 0.000 | 0.573                   | 0.000 |
| 201890      | ILMN_2405684 | BIRC3    | 0.476               | 0.000 | 0.445               | 0.001 | 0.636            | 0.000 | 0.237                   | 0.091 |
| 249618      | ILMN_1752802 | CLPTM1L  | 0.367               | 0.001 | 0.484               | 0.002 | 0.517            | 0.000 | 0.701                   | 0.000 |
| 343352      | ILMN_1779530 | COG6     | 0.403               | 0.000 | 0.510               | 0.000 | 0.622            | 0.000 | 0.451                   | 0.002 |
| 897971      | ILMN_1699112 | COPB1    | 0.345               | 0.001 | 0.579               | 0.000 | 0.468            | 0.000 | 0.556                   | 0.000 |
| 884480      | ILMN_1798189 | COX7C    | 0.500               | 0.000 | 0.341               | 0.017 | 0.609            | 0.000 | 0.407                   | 0.004 |
| 814381      | ILMN_2112493 | DAP      | 0.404               | 0.000 | 0.565               | 0.000 | 0.790            | 0.000 | 0.621                   | 0.000 |
| 487082      | ILMN_1706498 | DSE      | 0.378               | 0.000 | 0.365               | 0.010 | 0.586            | 0.000 | 0.444                   | 0.002 |
| 22918       | ILMN_1768127 | EBNA1BP2 | 0.293               | 0.004 | 0.242               | 0.086 | 0.696            | 0.000 | 0.352                   | 0.012 |
| 469151      | ILMN_1798014 | EIF2S2   | 0.508               | 0.000 | 0.571               | 0.000 | 0.444            | 0.001 | 0.439                   | 0.001 |
| 810237      | ILMN_1665717 | EIF2S3   | 0.427               | 0.000 | 0.248               | 0.076 | 0.492            | 0.000 | 0.320                   | 0.021 |
| 307532      | ILMN_1685722 | EIF4A2   | 0.434               | 0.000 | 0.459               | 0.000 | 0.633            | 0.000 | 0.552                   | 0.000 |
| 25988       | ILMN_2370772 | EIF4G1   | 0.468               | 0.000 | 0.314               | 0.038 | 0.636            | 0.000 | 0.446                   | 0.002 |
| 809453      | ILMN_1802376 | FAM48A   | 0.415               | 0.000 | 0.349               | 0.016 | 0.492            | 0.000 | 0.344                   | 0.018 |
| 133158      | ILMN_1750160 | FASTKD3  | 0.619               | 0.000 | 0.782               | 0.000 | 0.645            | 0.000 | 0.608                   | 0.000 |
| 82171       | ILMN_1687940 | FOXO3    | 0.335               | 0.002 | 0.315               | 0.033 | 0.618            | 0.000 | 0.359                   | 0.015 |
| 289551      | ILMN_2389273 | FXR1     | 0.435               | 0.000 | 0.530               | 0.000 | 0.752            | 0.000 | 0.554                   | 0.000 |
| 127509      | ILMN_1789702 | GBE1     | 0.347               | 0.001 | 0.271               | 0.057 | 0.465            | 0.000 | 0.365                   | 0.009 |
| 754085      | ILMN_1745798 | GTF2F2   | 0.344               | 0.001 | 0.473               | 0.000 | 0.700            | 0.000 | 0.480                   | 0.000 |
| 811942      | ILMN_2157957 | GTF2H1   | 0.341               | 0.001 | 0.323               | 0.021 | 0.449            | 0.000 | 0.215                   | 0.130 |
| 256664      | ILMN_2200331 | H2AFX    | 0.388               | 0.000 | 0.305               | 0.036 | 0.495            | 0.000 | 0.332                   | 0.021 |
| 502669      | ILMN_1767747 | HDAC2    | 0.439               | 0.000 | 0.471               | 0.000 | 0.521            | 0.000 | 0.652                   | 0.000 |
| 1606829     | ILMN_1764396 | HDAC4    | 0.357               | 0.001 | 0.397               | 0.005 | 0.395            | 0.004 | 0.301                   | 0.036 |
| 843319      | ILMN_1792497 | HRB      | 0.425               | 0.000 | 0.466               | 0.000 | 0.292            | 0.036 | 0.415                   | 0.002 |
| 810942      | ILMN_1802706 | IDH3G    | 0.428               | 0.000 | 0.486               | 0.000 | 0.789            | 0.000 | 0.275                   | 0.051 |
| 795282      | ILMN_1664641 | MED4     | 0.568               | 0.000 | 0.502               | 0.000 | 0.445            | 0.001 | 0.446                   | 0.003 |
| 131653      | ILMN_2371964 | MRPS12   | 0.455               | 0.000 | 0.521               | 0.000 | 0.785            | 0.000 | 0.548                   | 0.000 |
| 810979      | ILMN_1815043 | MRPS2    | 0.365               | 0.001 | 0.333               | 0.018 | 0.495            | 0.000 | 0.507                   | 0.000 |
| 470216      | ILMN_1727080 | MYO6     | 0.373               | 0.000 | 0.219               | 0.122 | 0.298            | 0.032 | 0.373                   | 0.007 |
| 26711       | ILMN_1720442 | NCBP2    | 0.494               | 0.000 | 0.442               | 0.002 | 0.590            | 0.000 | 0.682                   | 0.000 |
| 753457      | ILMN_1728810 | NDUFS1   | 0.431               | 0.000 | 0.405               | 0.004 | 0.383            | 0.005 | 0.476                   | 0.000 |
| 795439      | ILMN_2323491 | NUP62    | 0.318               | 0.002 | 0.438               | 0.002 | 0.281            | 0.044 | 0.451                   | 0.001 |
| 134439      | ILMN_1712687 | PAK2     | 0.304               | 0.003 | 0.245               | 0.093 | 0.414            | 0.002 | 0.568                   | 0.000 |
| 137836      | ILMN_2269002 | PDCD10   | 0.588               | 0.000 | 0.646               | 0.000 | 0.775            | 0.000 | 0.705                   | 0.000 |
| 80374       | ILMN_1772369 | PDHA1    | 0.327               | 0.001 | 0.177               | 0.214 | 0.743            | 0.000 | 0.207                   | 0.144 |
| 248454      | ILMN_1815261 | PDIA4    | 0.357               | 0.001 | 0.289               | 0.049 | 0.621            | 0.000 | 0.445                   | 0.002 |
| 454475      | ILMN_1814074 | PHKA2    | 0.470               | 0.000 | 0.298               | 0.036 | 0.656            | 0.000 | 0.418                   | 0.003 |
| 112131      | ILMN_1776076 | POFUT1   | 0.303               | 0.003 | 0.476               | 0.000 | 0.662            | 0.000 | 0.457                   | 0.000 |
| 2191807     | ILMN_1773613 | POU2F3   | 0.399               | 0.000 | 0.257               | 0.113 | 0.295            | 0.052 | 0.120                   | 0.431 |
| 769657      | ILMN_1683044 | PPP1R2   | 0.524               | 0.000 | 0.551               | 0.000 | 0.558            | 0.000 | 0.637                   | 0.000 |
| 125148      | ILMN_1813766 | RCL1     | 0.603               | 0.000 | 0.492               | 0.000 | 0.719            | 0.000 | 0.515                   | 0.000 |
| 853151      | ILMN_1651850 | RPS16    | 0.440               | 0.000 | 0.418               | 0.002 | 0.042            | 0.766 | 0.169                   | 0.236 |
| 795453      | ILMN_1721842 | RYBP     | 0.494               | 0.000 | 0.606               | 0.000 | 0.522            | 0.000 | 0.480                   | 0.000 |
| 450131      | ILMN_1752111 | SMARCAL1 | 0.437               | 0.000 | 0.614               | 0.000 | 0.521            | 0.000 | 0.625                   | 0.000 |
| 295255      | ILMN_1788211 | SNX19    | 0.422               | 0.000 | 0.417               | 0.006 | 0.671            | 0.000 | 0.440                   | 0.003 |
| 884657      | ILMN_1738938 | TIMM8B   | 0.432               | 0.000 | 0.649               | 0.000 | 0.717            | 0.000 | 0.587                   | 0.000 |
| 878744      | ILMN_1747146 | TSG101   | 0.538               | 0.000 | 0.554               | 0.000 | 0.632            | 0.000 | 0.549                   | 0.000 |
| 739126      | ILMN_1697777 | TSTA3    | 0.387               | 0.000 | 0.336               | 0.020 | 0.336            | 0.000 | 0.222                   | 0.128 |
| 346292      | ILMN_1675674 | UBE4B    | 0.304               | 0.003 | 0.460               | 0.001 | 0.661            | 0.000 | 0.367                   | 0.011 |
| 206545      | ILMN_2174884 | XPO7     | 0.400               | 0.000 | 0.434               | 0.001 | 0.742            | 0.000 | 0.614                   | 0.000 |
| 126702      | ILMN_1792990 | ZNF202   | 0.333               | 0.001 | 0.355               | 0.013 | 0.289            | 0.038 | 0.387                   | 0.006 |

<sup>a</sup>Data for the genes in Figure 5 are shown, except for SLC25A6 which was not included in the Illumina data set.
